# Supplementary material
Source: HighWire-hosted journal article supplement (http://ajnr-stage2.highwire.org/highwire/filestream/94809/field_highwire_adjunct_files/0/0668.pdf)
Supplement: 0668.pdf [file 0668.pdf]

## Supplementary Material

| <b>a) Multimodal-CT Scan parameters</b> | <b>NCCT and CECT<sup>#</sup></b> | <b>CTP<sup>x</sup></b> | <b>CTA<sup>y</sup></b>        |
|-----------------------------------------|----------------------------------|------------------------|-------------------------------|
| Kilovolts                               | 120                              | 80                     | 100/140 (dual energy)         |
| mAs                                     | care dose/ quality ref mAs 231   | 120                    | care dose/ quality ref mAs 96 |
| Pitch                                   | 0.55                             | N.A.                   | 0.7                           |
| Collimation (mm)                        | 40 x 0.6                         | 32 x 1.2               | 128 x 0.6                     |
| Rotation time                           | 1                                | 0.28                   | 0.28                          |
| Section thickness/interval (mm)         | 0.75/0.5                         | 1.5/1                  | 0.75/0.5                      |
| Reconstruction thickness/interval (mm)  | MPR 3 planes 3/3                 | MPR axial 5/5          | MIP 3 planes 11/3             |

| <b>b) MR Scan parameters</b> | <b>DWI</b> | <b>T2</b> | <b>FLAIR</b> | <b>T2*</b> |
|------------------------------|------------|-----------|--------------|------------|
| TR, msec                     | 5870       | 7390      | 8000         | 600        |
| TE, msec                     | 68         | 94        | 85           | 19.9       |
| TI, msec                     | N.A.       | N.A.      | 2373         | N.A.       |
| Flip angle, deg              | 180        | 150       | 150          | 20         |
| Field of view (mm)           | 220        | 220       | 220          | 220        |
| Matrix                       | 192 x 192  | 448 x 189 | 256 x 179    | 256 x 192  |
| Slice thickness (mm)         | 4          | 3         | 3            | 3          |
| Parallel imaging factor      | 2x         | none      | 2x           | 3x         |
| Scanning plane               | Axial      | axial     | axial        | Axial      |
| Scan time                    | 3:09       | 1:52      | 2:10         | 1:38       |

Supplementary Table 1: Multimodal-CT (a) and MR (b) technical parameters.

<sup>#</sup> Contrast-enhanced CT (CECT) was performed when necessary.

<sup>x</sup> injection of 15 mL of saline, followed by 40 mL of Accupaque (Iodine 350 mg/mL) and by 40 mL of saline at a rate of 5 mL/sec

<sup>y</sup> injection of 15 mL of saline, followed by 50 mL of Accupaque (Iodine 350 mg/mL) and by 40 mL of saline at a rate of 4.5 mL/sec

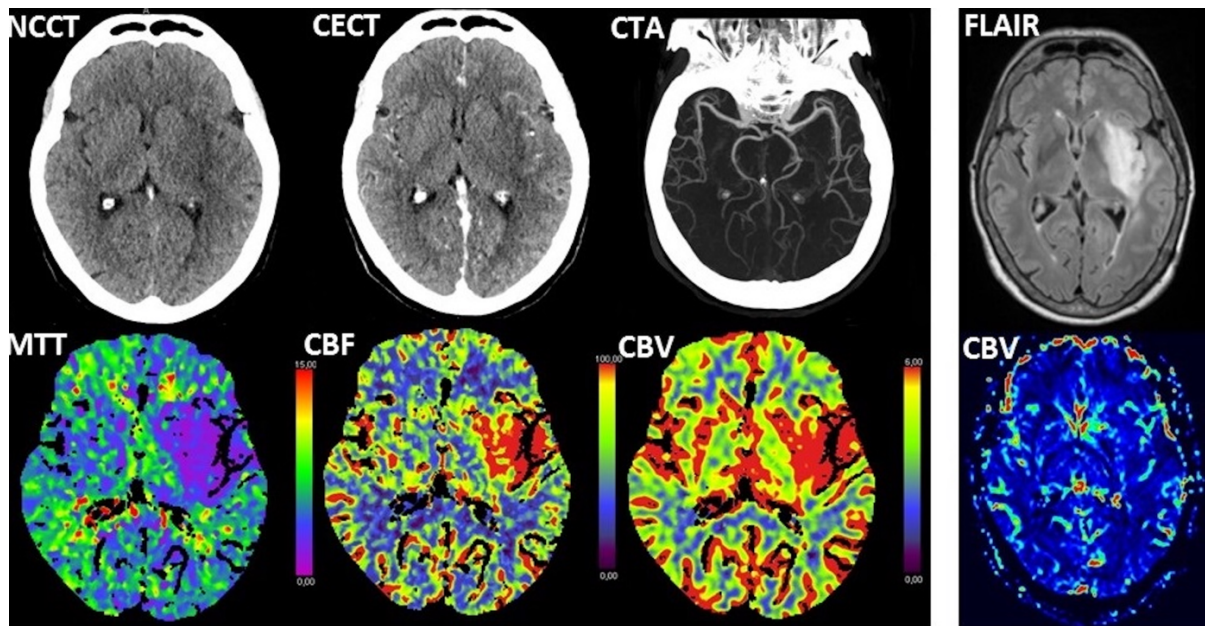

**Supplementary Figure 1.** Left panel: hyperperfusion in the left temporo-insular cortex in an 83-year-old female found unconscious. On NCCT there is a hypodense lesion in the left lenticulo-capsular region, insula and temporal lobe, with partial sparing of the cortical ribbon. No contrast enhancement or CTA abnormalities are found. Right panel: MR shows an infiltrative lesion suggestive of a low-grade glioma (biopsy proved a diffuse astrocytoma, IDH mutant). MR Perfusion (CBV) demonstrates regression of perfusion abnormalities visible on multimodal-CT, indicating seizure related changes.

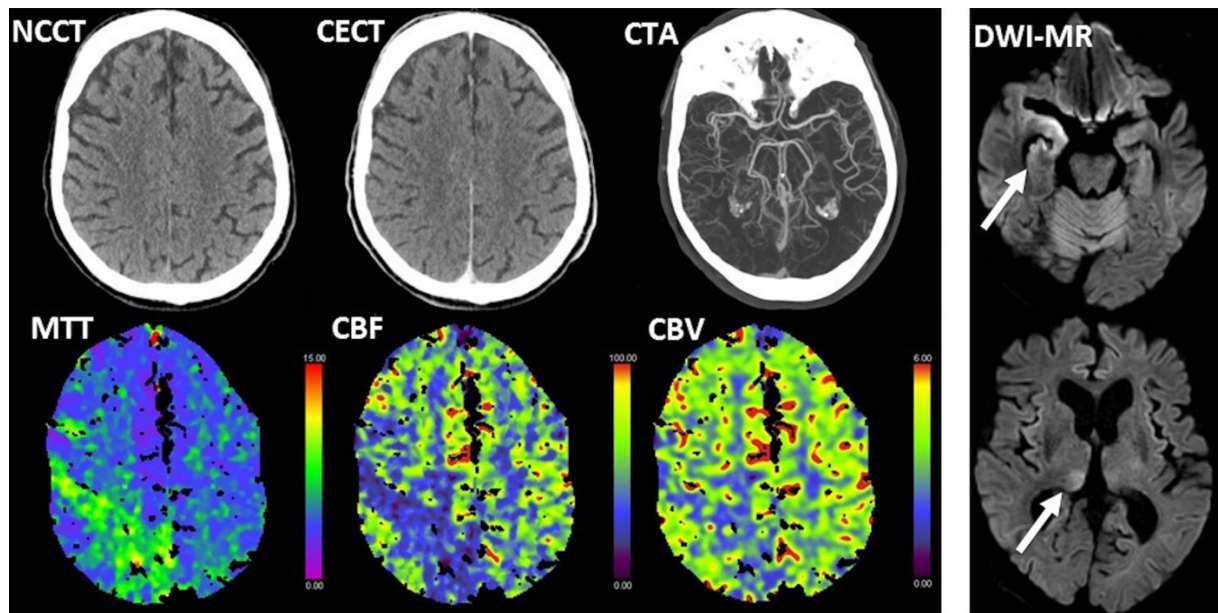

**Supplementary Figure 2.** Left panel: right temporo-parietal prolonged MTT, decreased CBV and decreased CBF, consistent with hypoperfusion involving two adjacent vascular territories in a 79-year-old male with acute left hemiplegia and aphasia with normal findings at NCCT, CECT and CTA. Right panel: Diffusion MR excludes ischemia and demonstrates seizure changes (arrow) in the right hippocampus and pulvinar.
